# Supplementary material
Source: PubMed Central journal article supplement (PMC4894458)
Supplement: NIHMS65837-supplement-Supplementary_Material.pdf [file NIHMS65837-supplement-Supplementary_Material.pdf]

**XYZ coordinates for the atomic positions of the 4-aminophenol(-H) on the Pt(111) surface in the (4× 4) dilute phase reported in Figure 3 of the main manuscript**

62

|    |           |           |           |
|----|-----------|-----------|-----------|
| H  | 4.278827  | 3.530771  | 9.581156  |
| H  | 6.640028  | -0.204856 | 9.492286  |
| O  | 2.005046  | -0.508017 | 9.434150  |
| C  | 5.665154  | 1.792097  | 9.376436  |
| H  | 6.996947  | 3.545329  | 9.319476  |
| H  | 2.155622  | 2.203361  | 9.293585  |
| H  | 7.829081  | 2.115661  | 9.281541  |
| H  | 4.508769  | -1.533676 | 9.238614  |
| C  | 4.379427  | 2.504919  | 9.160754  |
| C  | 5.736411  | 0.339438  | 9.132811  |
| N  | 6.923214  | 2.555601  | 8.963820  |
| C  | 3.106535  | 1.727583  | 8.951736  |
| C  | 4.489241  | -0.467787 | 8.911120  |
| C  | 3.060570  | 0.171647  | 8.866628  |
| Pt | 3.897295  | 2.605614  | 7.035998  |
| Pt | 5.521439  | -0.072784 | 6.988700  |
| Pt | 9.711952  | 2.524257  | 6.952637  |
| Pt | 8.317685  | 0.108056  | 6.889143  |
| Pt | 11.009368 | 9.860020  | 6.888627  |
| Pt | 8.299448  | 4.982254  | 6.868667  |
| Pt | 5.446121  | 4.951019  | 6.859001  |
| Pt | 6.971286  | 2.592285  | 6.833073  |
| Pt | 6.857482  | 7.287357  | 6.827558  |
| Pt | 9.540535  | 7.445055  | 6.809582  |
| Pt | 4.022461  | -2.494361 | 6.796154  |
| Pt | 11.126122 | 4.929064  | 6.746904  |
| Pt | 6.901722  | 0.840773  | 4.636460  |
| Pt | 5.526430  | 3.256222  | 4.616016  |
| Pt | 4.166887  | 0.862288  | 4.577681  |
| Pt | 2.771210  | 3.258614  | 4.570986  |
| Pt | 5.521403  | 8.179869  | 4.529097  |
| Pt | 9.751412  | 10.583921 | 4.527358  |
| Pt | 8.348537  | 3.266054  | 4.526180  |
| Pt | 2.707179  | -1.597734 | 4.504361  |
| Pt | 9.766289  | 5.719338  | 4.502117  |
| Pt | 6.962765  | 5.709564  | 4.501513  |
| Pt | 4.148875  | 5.705358  | 4.489341  |
| Pt | 8.359422  | 8.181312  | 4.484586  |
| Pt | 2.881486  | 6.563083  | 2.208426  |
| Pt | 5.713052  | 1.693864  | 2.208045  |
| Pt | 4.307091  | 4.127993  | 2.207848  |
| Pt | 5.712269  | 6.562939  | 2.207848  |
| Pt | 8.523516  | 6.562864  | 2.207790  |
| Pt | 7.118140  | 4.128276  | 2.207651  |
| Pt | 2.900589  | 1.693475  | 2.207422  |
| Pt | 8.533189  | 11.442674 | 2.207422  |
| Pt | 4.297156  | 9.008186  | 2.207384  |
| Pt | 1.476526  | 4.127625  | 2.207339  |
| Pt | 1.495095  | -0.740853 | 2.207060  |
| Pt | 7.127697  | 9.008345  | 2.207060  |
| Pt | 4.288082  | 7.374765  | -0.086312 |
| Pt | 0.070557  | 4.939657  | -0.086767 |
| Pt | 1.476509  | 2.504348  | -0.087042 |
| Pt | 7.109110  | 12.253550 | -0.087042 |
| Pt | 0.070475  | 0.069287  | -0.087342 |
| Pt | 5.703076  | 9.818486  | -0.087342 |
| Pt | 7.118077  | 7.374791  | -0.087367 |
| Pt | 4.307129  | 2.504146  | -0.087386 |
| Pt | 2.881755  | 4.940088  | -0.087391 |
| Pt | 2.890928  | 9.818927  | -0.087405 |
| Pt | 1.476475  | 7.374221  | -0.087443 |
| Pt | 5.712418  | 4.939114  | -0.087607 |
